# Supplementary material
Source: publisher figshare collection journal article supplement (https://acs.figshare.com/ndownloader/files/15592637)
Supplement: Supplementary file 1 [file 15592637]

## SUPPORTING INFORMATION

### **$^{13}\text{C}$ NMR Investigations of Hairy-Rod Like $\pi$ -Conjugated Mesogens**

A. A. Boopathi<sup>†‡</sup>, K. Janani<sup>†</sup>, Nitin P. Lobo<sup>‡‡</sup> and T. Narasimhaswamy<sup>†‡\*</sup>

<sup>†</sup>Polymer Science and Technology, <sup>‡</sup>Inorganic and Physical Chemistry,

CSIR-Central Leather Research Institute, Adyar, Chennai 600020, India

<sup>‡</sup>Academy of Scientific and Innovative Research (AcSIR), Ghaziabad, Uttar Pradesh 201002,  
India

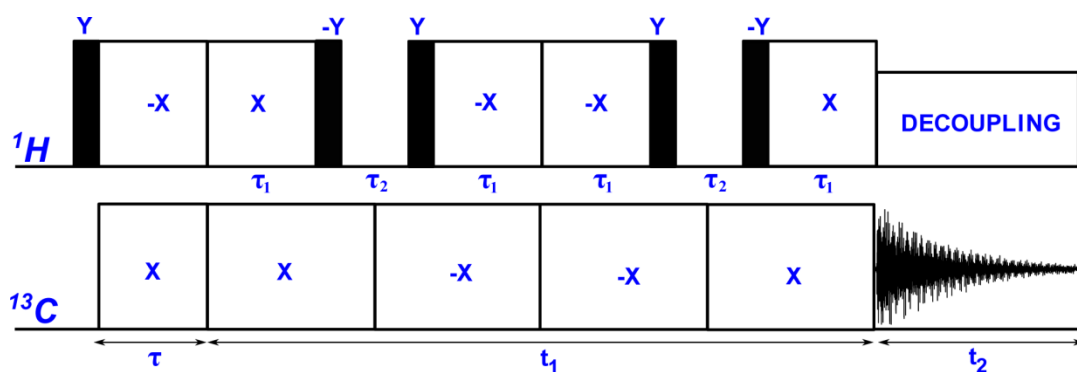

**Figure S1:** Pulse sequence for SAMPI-4 experiment, which is a CP based SLF scheme provides the 2D correlation spectrum between  $^{13}\text{C}$  chemical shift (in F2 dimension) and related  $^{13}\text{C}$ - $^1\text{H}$  dipolar frequency (F1 dimension). Experiment starts with a cross-polarization (CP) block with a polarization inversion for a contact time  $\tau$ , then during the  $t_1$  period high resolution heteronuclear  $^{13}\text{C}$ - $^1\text{H}$  dipolar couplings evolves under the absence of homonuclear  $^1\text{H}$ - $^1\text{H}$  dipolar couplings (suppressed by “magic sandwich” pulses) and finally  $^{13}\text{C}$  signals are acquired by employing SPINAL-64 heteronuclear decoupling pulse scheme during  $t_2$  period. Here the darker boxes represent  $90^\circ$  pulses.

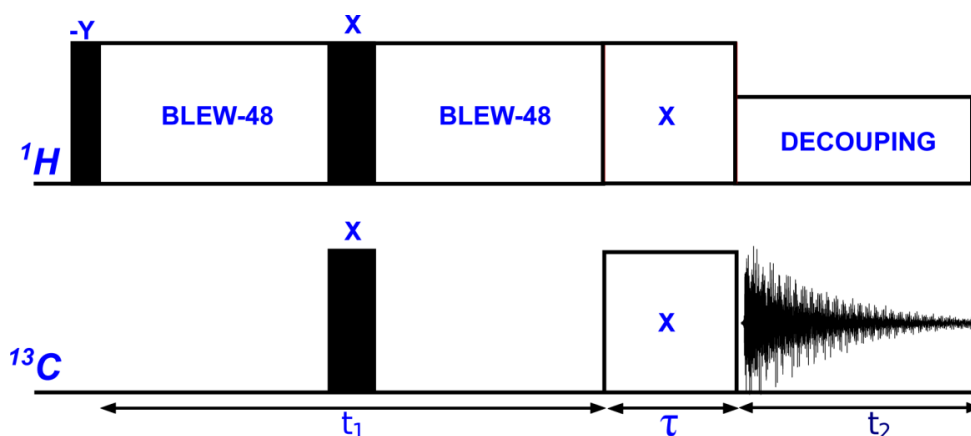

**Figure S2:** Pulse sequence for 2D Proton Encoded Local Field (PELF) experiment. During  $t_1$  heteronuclear  $^{13}\text{C}$ - $^1\text{H}$  dipolar couplings evolves under BLEW-48 homonuclear decoupling sequence to suppress the homonuclear  $^1\text{H}$ - $^1\text{H}$  dipolar couplings and SPINAL-64 heteronuclear decoupling sequence is applied during  $t_2$  period to acquire  $^{13}\text{C}$  signals. CP step with a contact time,  $\tau$  was used to transfer proton magnetization to carbon. Here, thin and thick rectangular darker boxes represent  $90^\circ$  and  $180^\circ$  pulses, respectively.

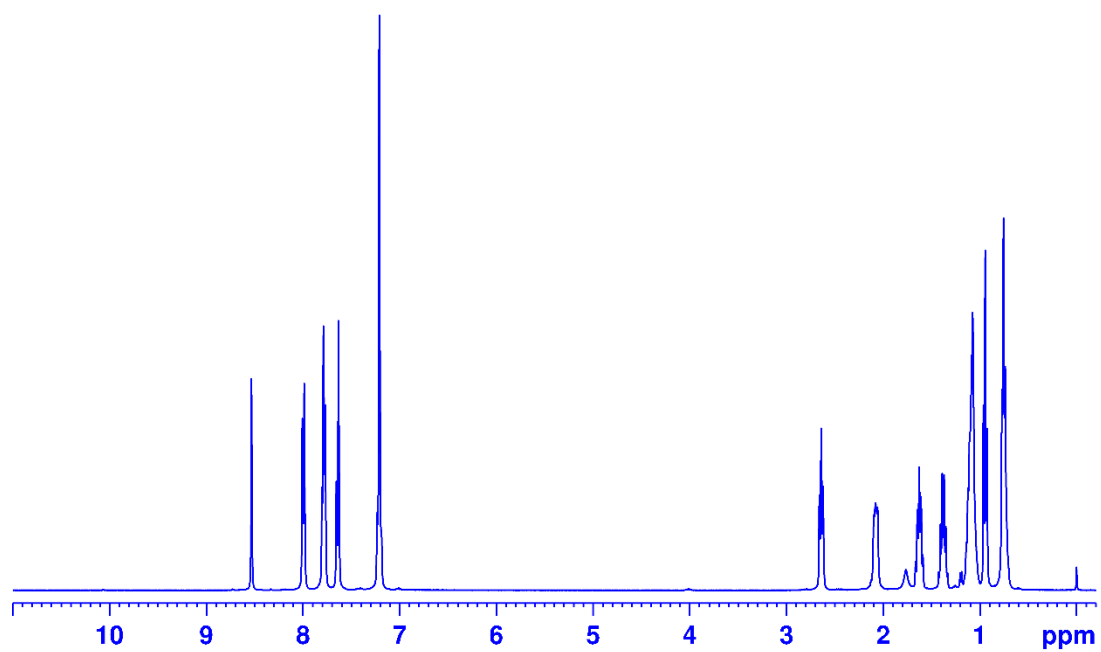

**Figure S3:**  $^1\text{H}$  NMR Spectrum of DFDPBM

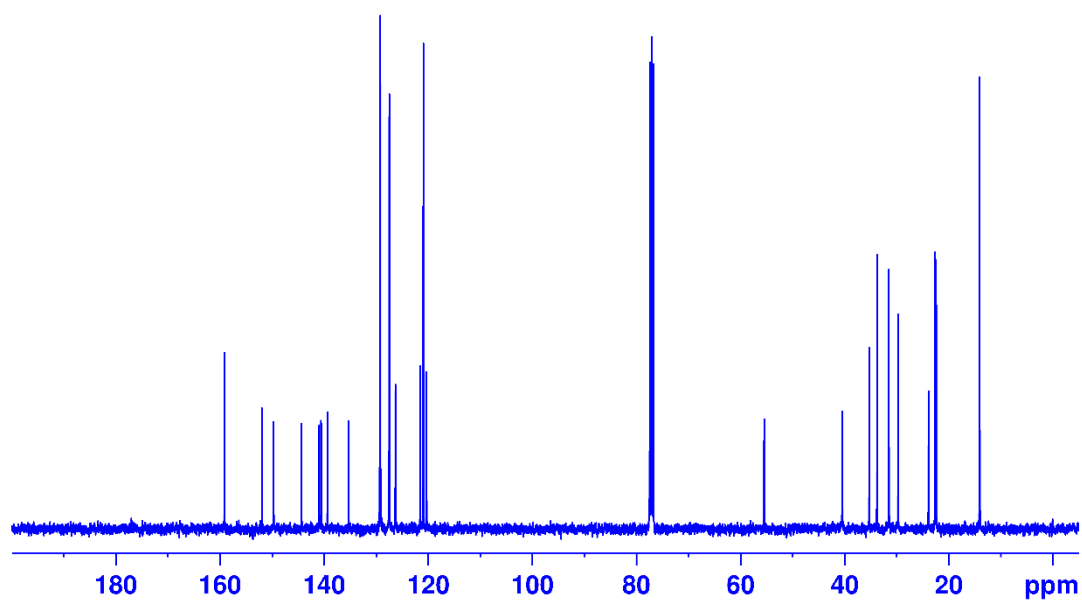

**Figure S4:**  $^{13}\text{C}$  NMR Spectrum of DFDPBM

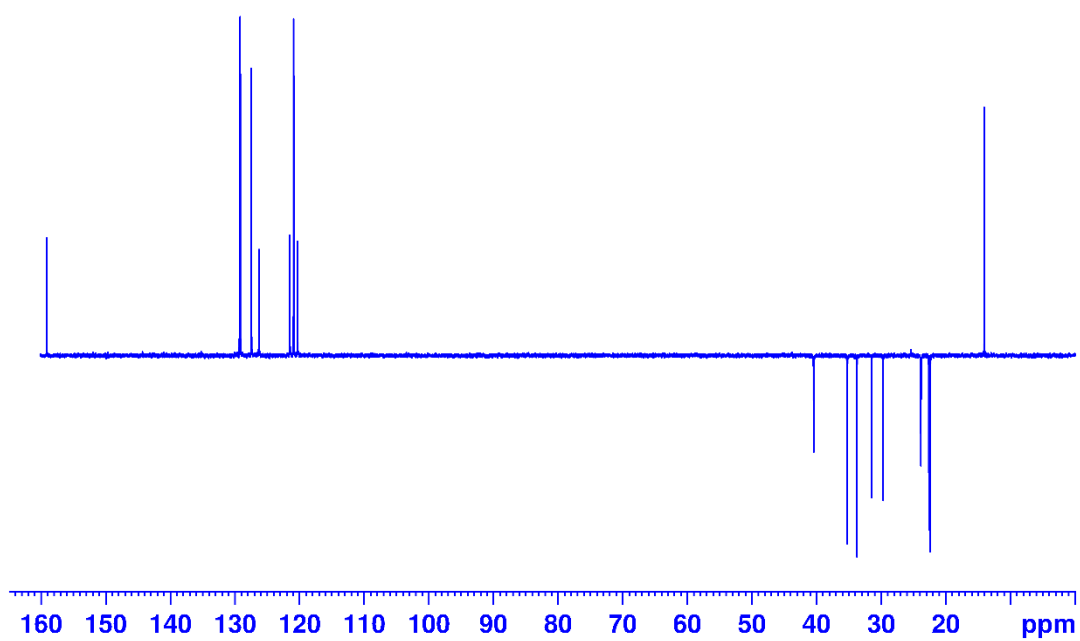

**Figure S5:**  $^{13}\text{C}$  DEPT Spectrum of DFDPBM

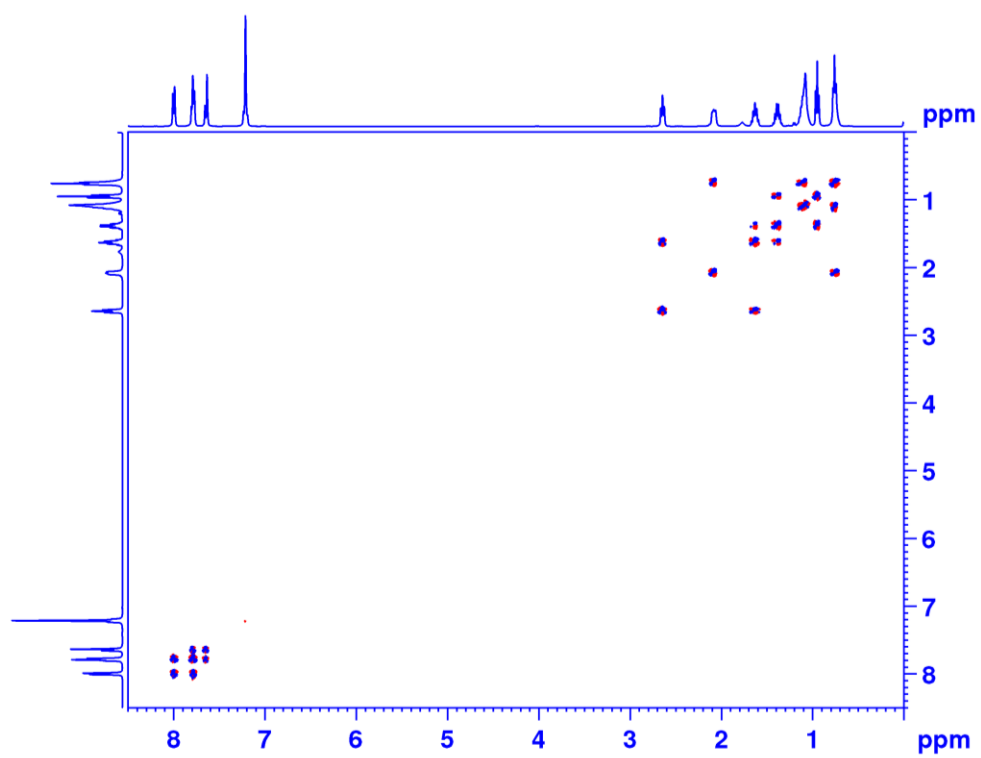

**Figure S6:**  $^1\text{H}$ - $^1\text{H}$  DQF-COSY NMR Spectrum of DFDPBM



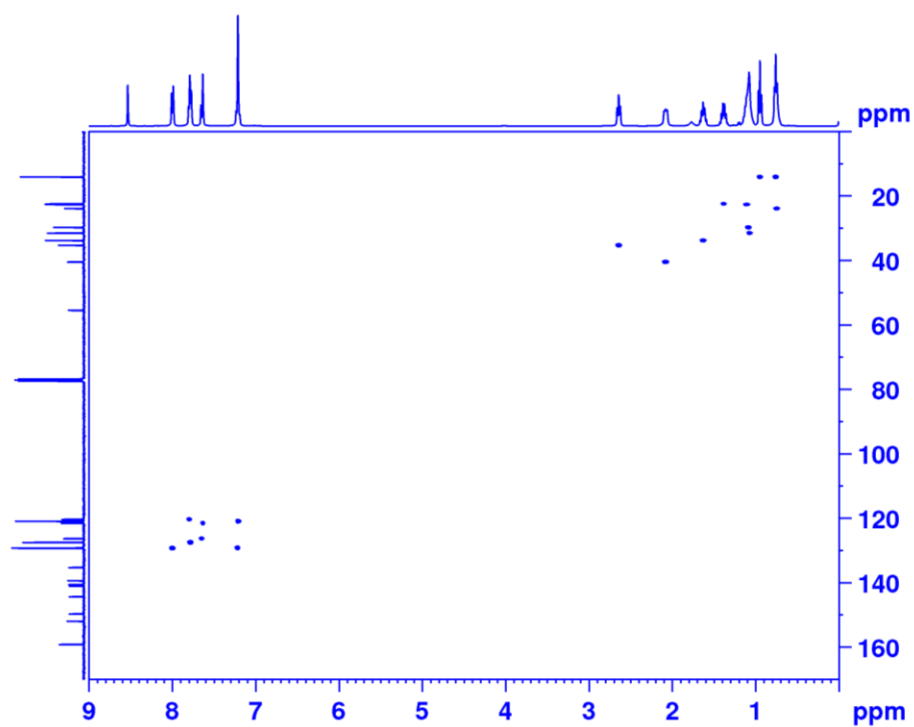

**Figure S9:**  $^1\text{H}$ - $^{13}\text{C}$  HSQC NMR Spectrum of DFDPBM

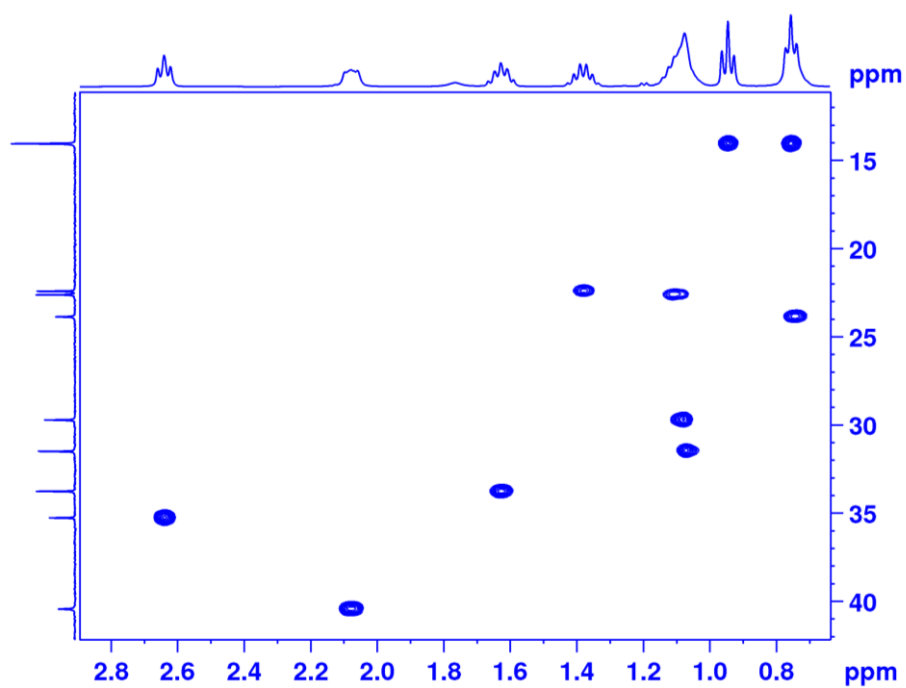

**Figure S10:**  $^1\text{H}$ - $^{13}\text{C}$  HSQC NMR Spectrum of DFDPBM: aliphatic region expansion

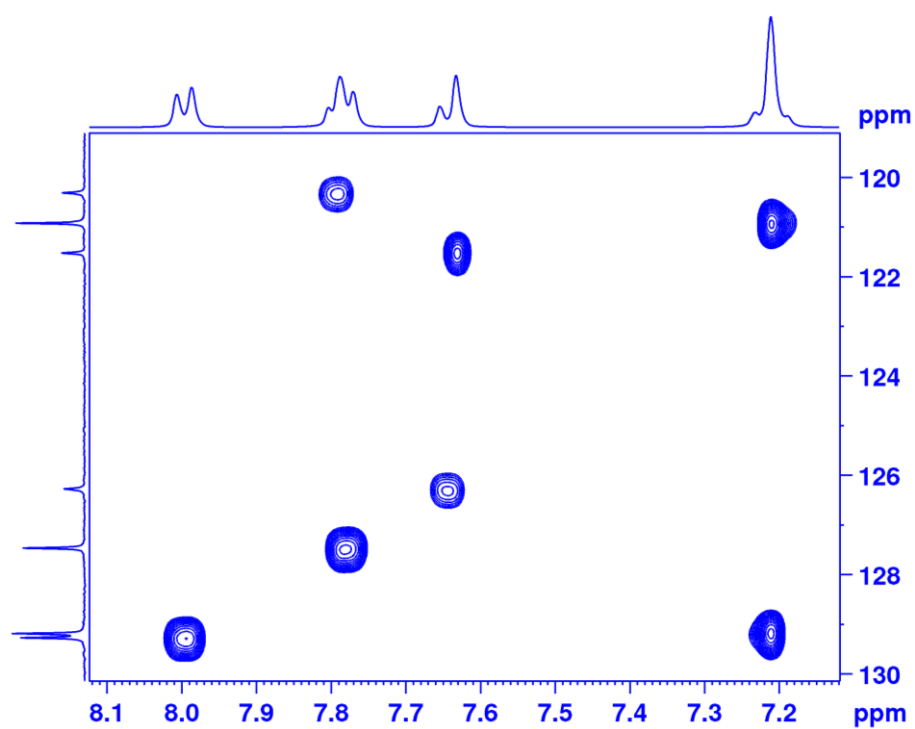

**Figure S11:**  $^1\text{H}$ - $^{13}\text{C}$  HSQC NMR Spectrum of DFDPBM: aromatic region expansion

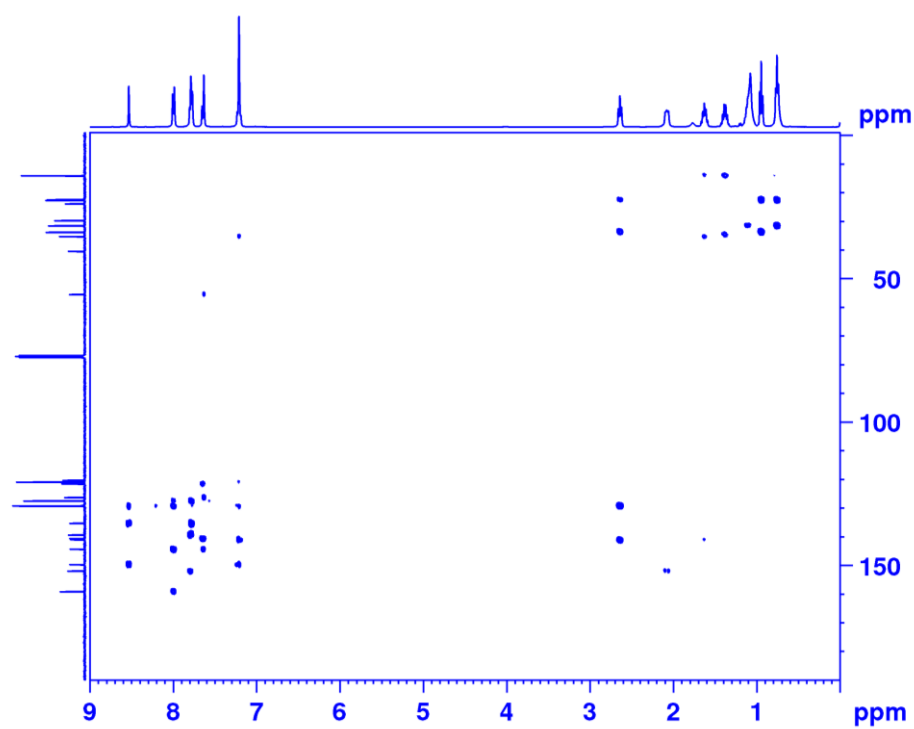

**Figure S12:**  $^1\text{H}$ - $^{13}\text{C}$  HMBC NMR Spectrum of DFDPBM

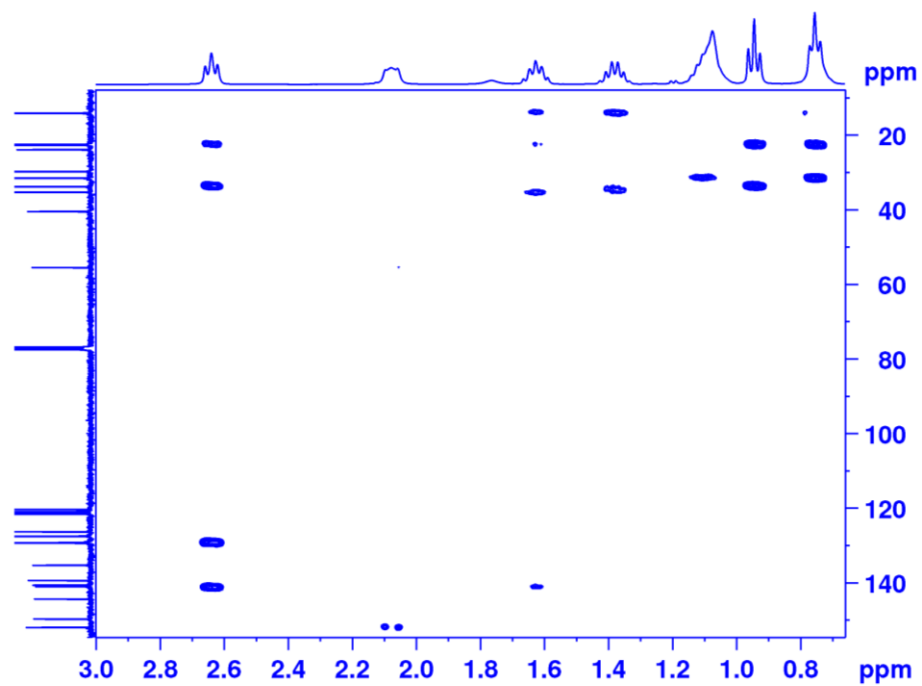

**Figure S13:**  $^1\text{H}$ - $^{13}\text{C}$  HMBC NMR Spectrum of DFDPBM: aliphatic region expansion

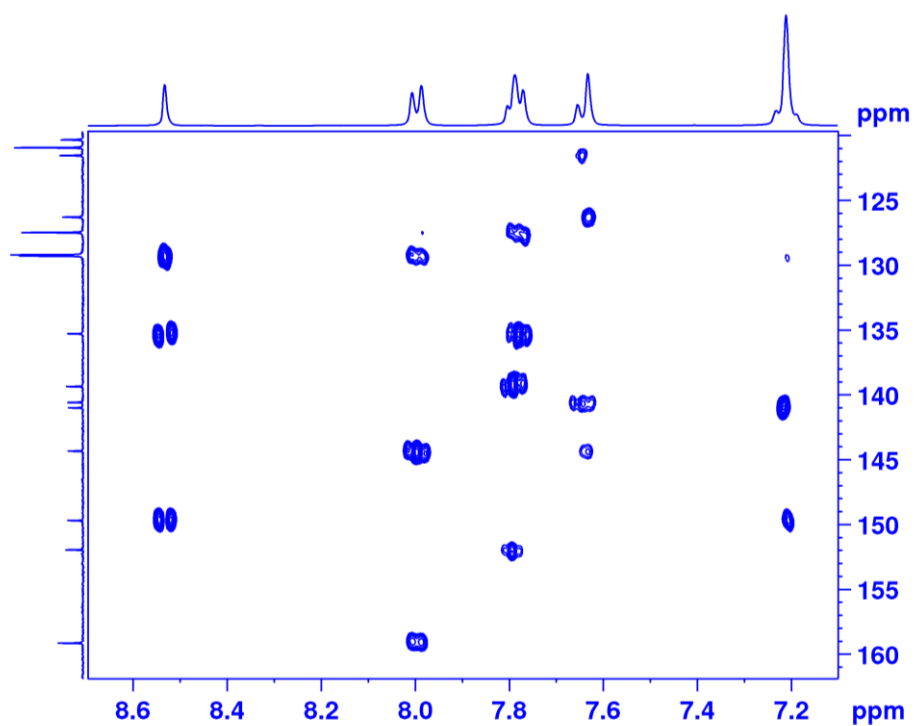

**Figure S14:**  $^1\text{H}$ - $^{13}\text{C}$  HMBC NMR Spectrum of DFDPBM: aromatic region expansion



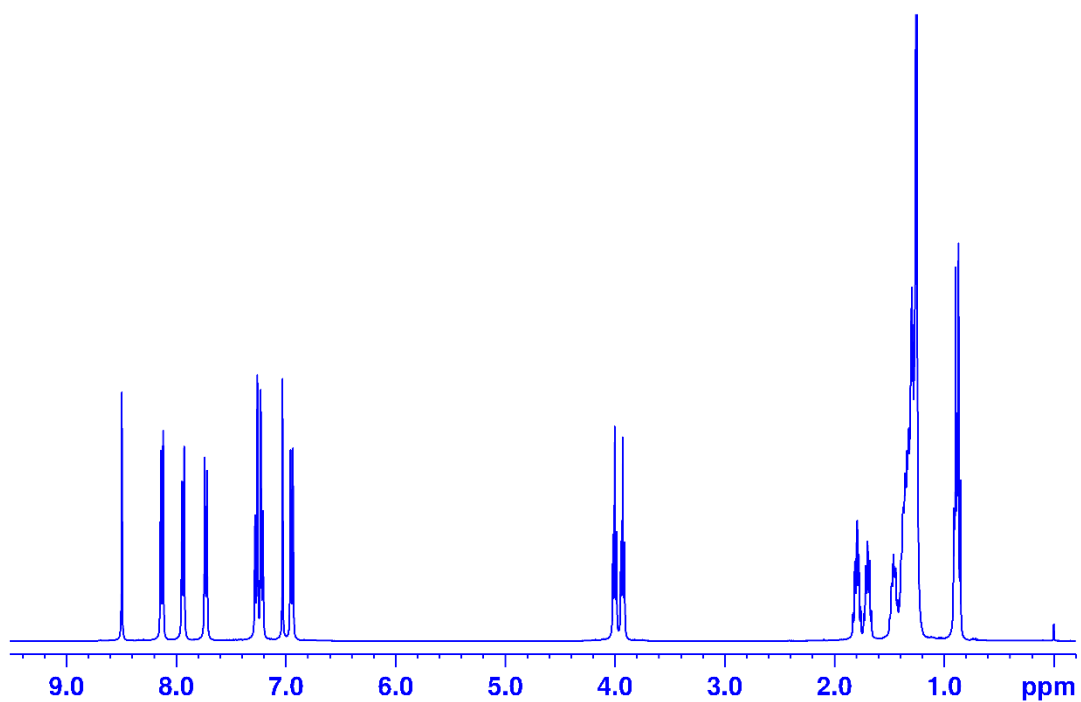

**Figure S15:**  $^1\text{H}$  NMR Spectrum of BTMPOB

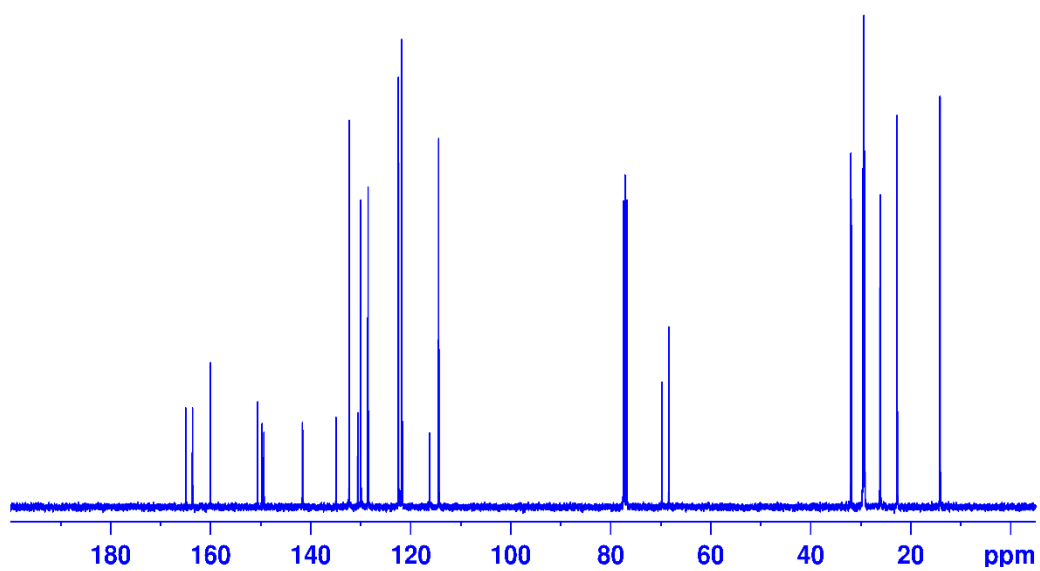

**Figure S16:**  $^{13}\text{C}$  NMR Spectrum of BTMPOB

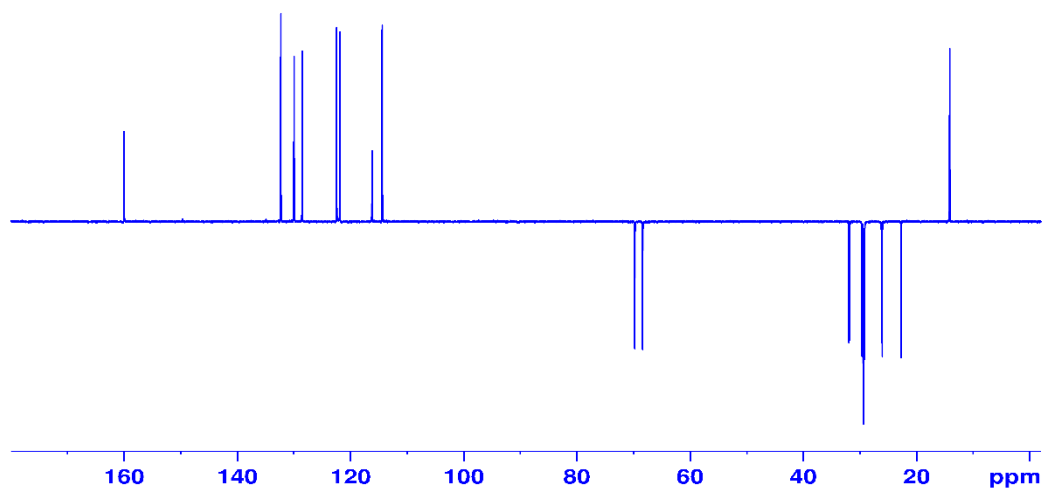

**Figure S17:**  $^{13}\text{C}$  DEPT NMR Spectrum of BTMPOB

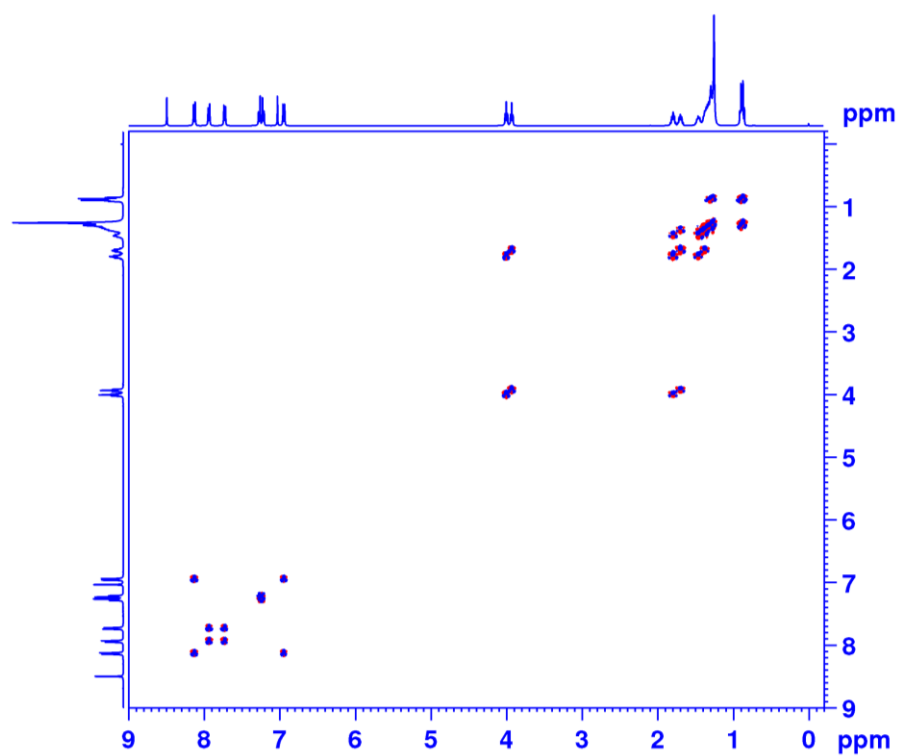

**Figure S18:**  $^1\text{H}$ - $^1\text{H}$  DQF-COSY NMR Spectrum of BTMPOB

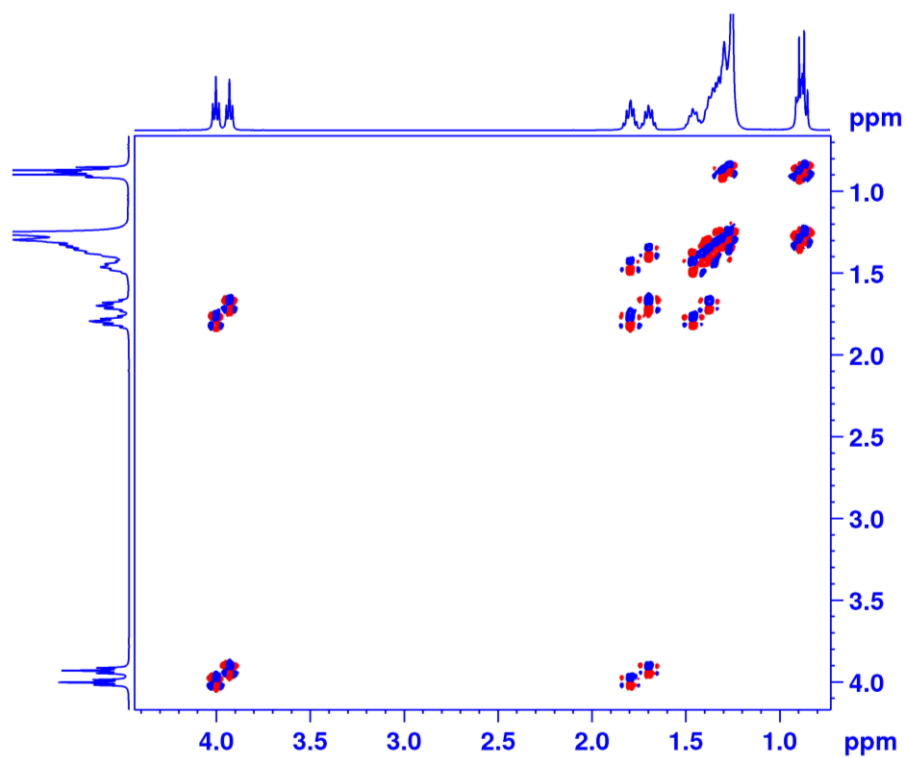

**Figure S19:**  $^1\text{H}$ - $^1\text{H}$  DQF-COSY NMR Spectrum of BTMPOB:aliphatic region expansion

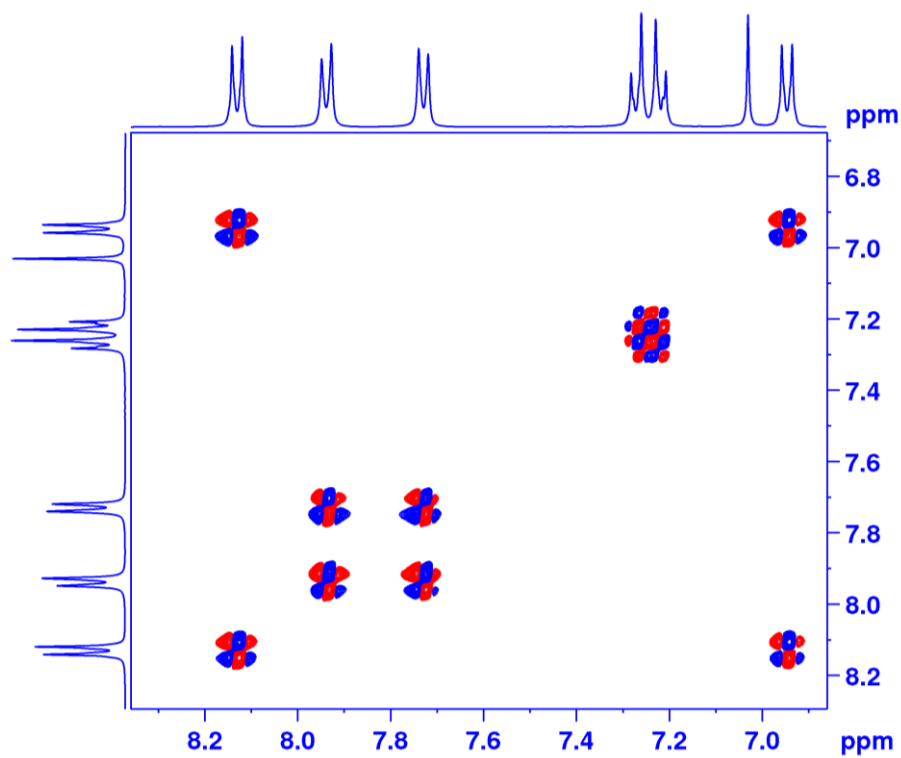

**Figure S20:**  $^1\text{H}$ - $^1\text{H}$  DQF-COSY NMR Spectrum of BTMPOB:aromatic region expansion

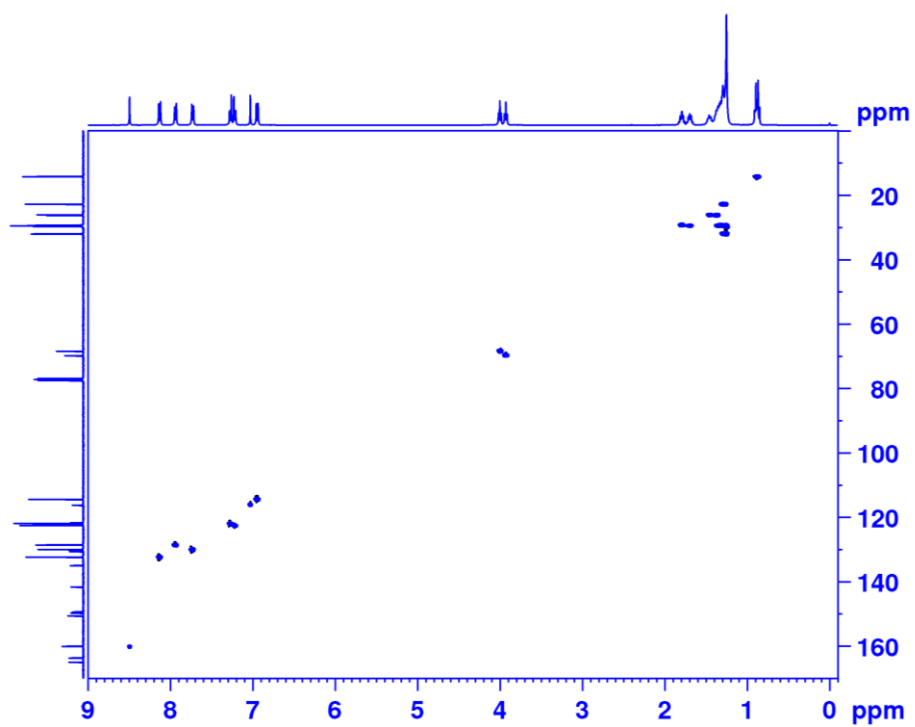

**Figure S21:**  $^1\text{H}$ - $^{13}\text{C}$  HSQC NMR Spectrum of BTMPOB

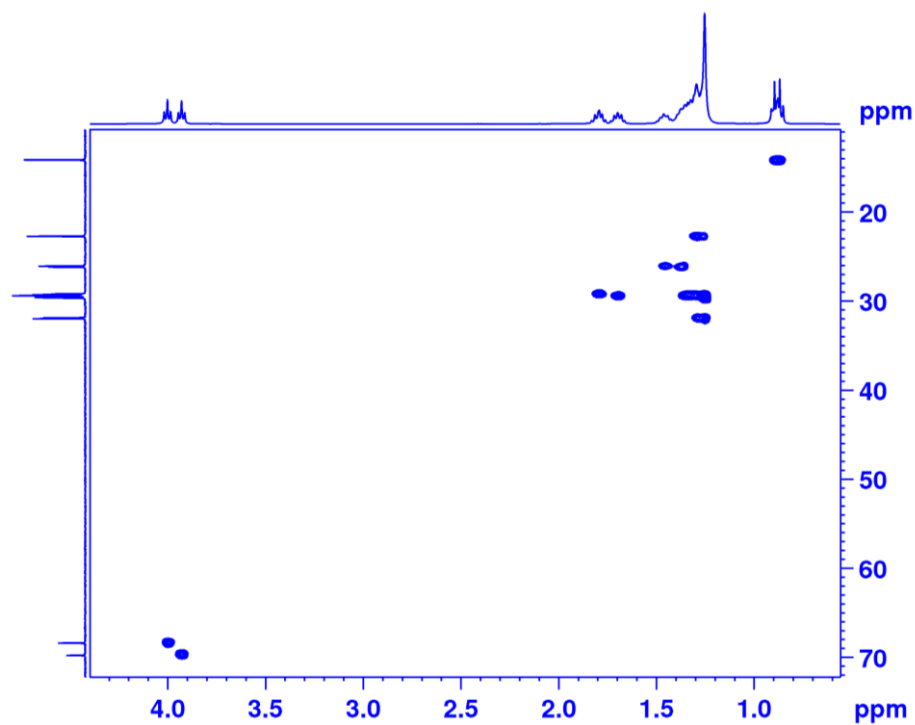

**Figure S22:**  $^1\text{H}$ - $^{13}\text{C}$  HSQC NMR Spectrum of BTMPOB: aliphatic region expansion

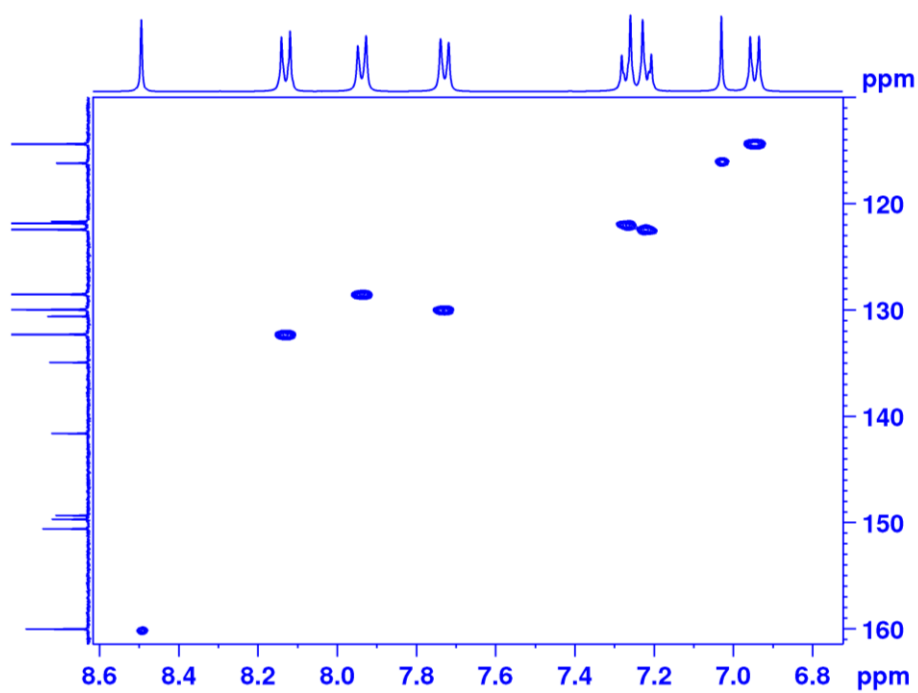

**Figure S23:**  $^1\text{H}$ - $^{13}\text{C}$  HSQC NMR Spectrum of BTMPOB: aromatic region expansion

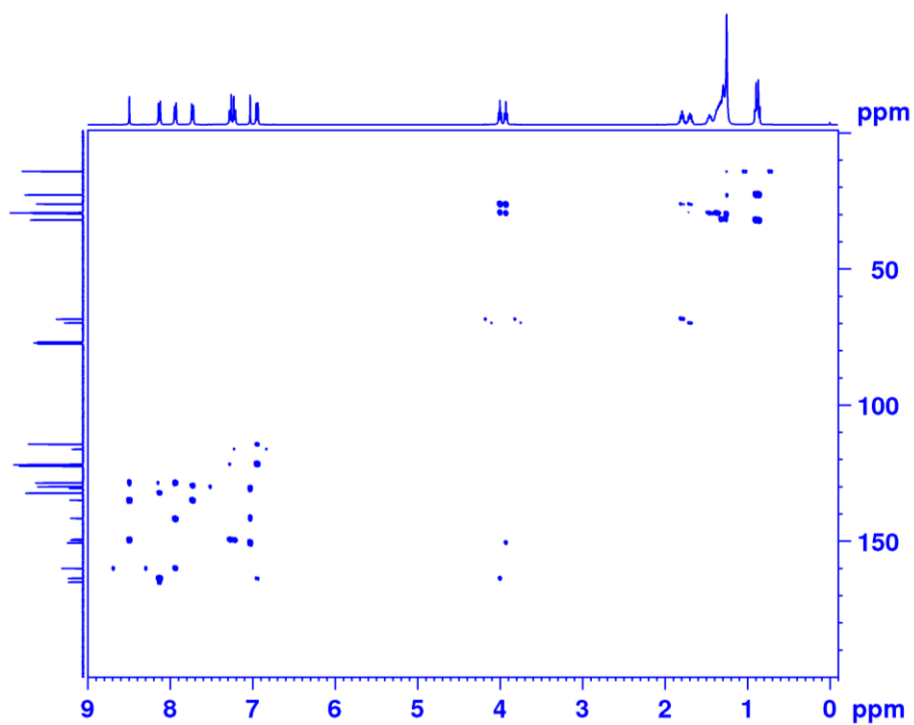

**Figure S24:**  $^1\text{H}$ - $^{13}\text{C}$  HMBC NMR Spectrum of BTMPOB

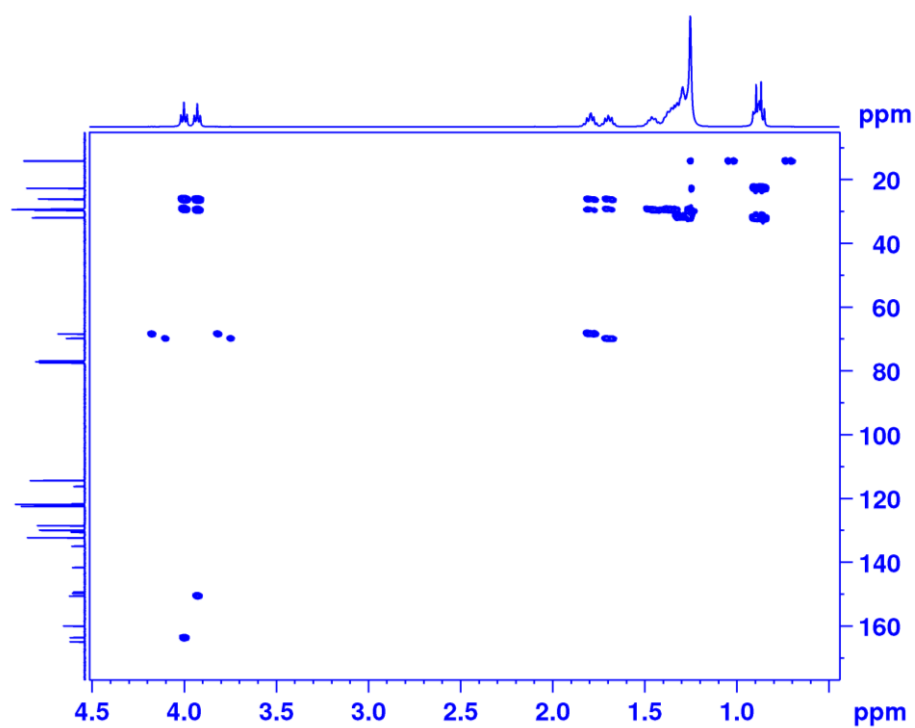

**Figure S25:**  $^1\text{H}$ - $^{13}\text{C}$  HMBC NMR Spectrum of BTMPOB: aliphatic region expansion

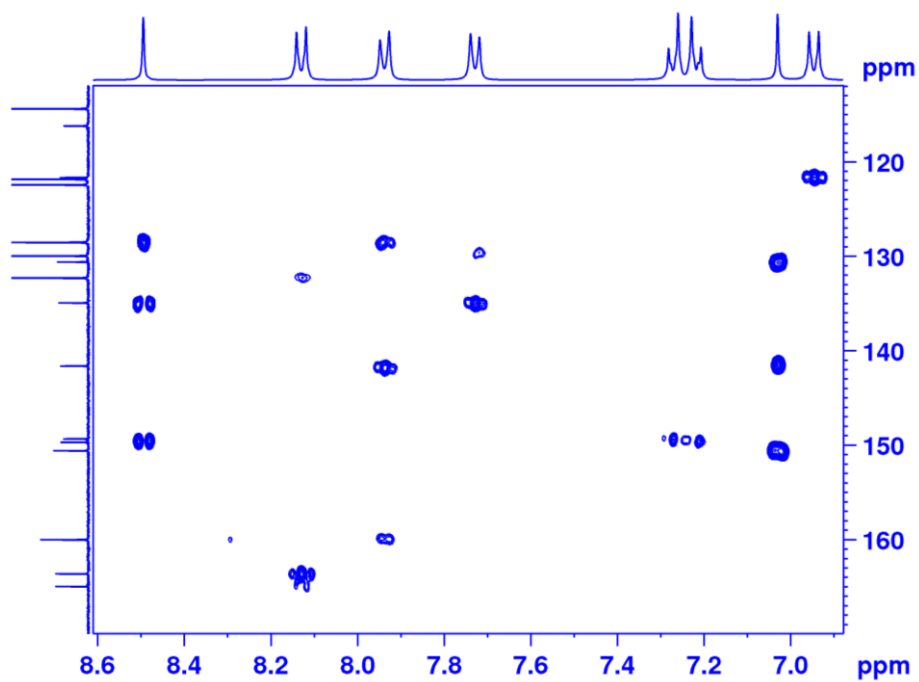

**Figure S26:**  $^1\text{H}$ - $^{13}\text{C}$  HMBC NMR Spectrum of BTMPOB: aromatic region expansion

## Orientalional Ordering of Aliphatic Chains

The 2D Proton Encoded Local Field (PELF) experiment spectrum correlates the  $^{13}\text{C}$  chemical shift with the associated  $^{13}\text{C}$ - $^1\text{H}$  dipolar couplings. BLEW-48<sup>1</sup> proton homonuclear decoupling sequence was employed during  $t_1$  period with a radio frequency (rf) field strength of 71.4 kHz and SPINAL-64 heteronuclear decoupling of strength 30 kHz was used during  $t_2$  period. Ramp CP step with a contact time of 1.8 ms was used to transfer proton magnetization to carbon. The  $F_1$  dimension frequency axis in the spectrum was scaled with a scaling factor of 0.42. The  $^{13}\text{C}$ - $^1\text{H}$  dipolar coupling ( $D_{CH}$ ) is related to the observed splitting  $\Delta\nu$  by the following equation

$$\Delta\nu = (2D_{CH} + J_{CH}) \quad (1)$$

where  $J_{CH}$  is the scalar coupling constant and for directly bonded CH pair we considered  $J_{CH} = 125$  Hz. By assuming a axially symmetry the order parameter of each C-H bond in each segment of the chain can then be calculated by following relation<sup>2</sup>

$$S_{CH} = D_{CH} / K \quad (2)$$

where  $K = -h\gamma_H\gamma_C/4\pi^2r_{CH}^3$ , with  $\gamma_H$  and  $\gamma_C$  are the gyromagnetic ratios of  $^1\text{H}$  and  $^{13}\text{C}$  nuclei respectively and  $r_{CH}$  is the inter nuclear distance between them.

## References

- (1) Burum, D. P.; Linder, N.; Ernst, R. R. Low-Power Multipulse Line Narrowing in Solid-State NMR. *J. Magn. Reson.* **1981**, *44*, 173–188.
- (2) Courtieu, J.; Bayle, J. P.; Fung, B. M. Variable Angle Sample Spinning NMR in Liquid Crystals. *Prog. Nucl. Magn. Reson. Spectrosc.* **1994**, *26*, 141-169
